# Supplementary material for: Attending pediatric acutely ill patients at home: families’ socioeconomic characterization, expectations, and experiences
Source: Springer Nature journal article supplement (doi:10.1186/s12887-022-03724-1), 2022-11-24
Supplement: MOESM1 [file 23751338]

# **Attending pediatric acutely ill patients at home: Families' socioeconomic characterization, expectations, and experiences**

**BMC Pediatrics**

**Astrid Batlle<sup>1\*</sup>, Santiago Thió-Henestrosa<sup>2</sup>, Imma Boada<sup>3</sup>, Sandra López<sup>1</sup>, José Carlos Fernández<sup>1</sup>,  
Isabel Moya<sup>1</sup>, Mariona Fernández de Sevilla<sup>1</sup>, Juan José García-García<sup>1</sup>**

<sup>1</sup>Hospital Sant Joan de Déu, Barcelona, Spain

<sup>2</sup>Departament Informàtica, Matemàtica Aplicada i Estadística, University of Girona, Girona, Spain

<sup>3</sup>Graphics and Imaging Laboratory, University of Girona, Girona, Spain

\*Corresponding author: [astrid.batlle@sjd.es](mailto:astrid.batlle@sjd.es)

**PREADMISSION QUESTIONNAIRE**

***Reason for choosing acute hospital-at-home care***

1. Choose the reasons why you decided to enroll your child to the hospital-at-home program (Multiple Choice):
  - a. Because of my child's health
  - b. Because of the economic burden that implies having my child admitted in hospital
  - c. Because of the home comfort for my family and my child
  - d. To improve familiar and labor conciliation
  - e. If other, please write down why:

***Expectations regarding the caregiver well-being at home***

2. After the brief description you have received about how the program works, do you think you will have any problems to contact hospital-at-home professionals if needed? Yes/No
3. After the training in medication administration and/or the care needed at home, do you think you will have any problems administering medication?
  - a. Yes. If this is your answer, please write down which problems are you thinking about:
  - b. No
4. How do you think your workload will be during home-hospitalization?
  - a. More workload than normally
  - b. The same workload that I had prior to being admitted to hospital
  - c. Less workload than normally
5. How do you think you will feel at home?
  - a. Better than hospital
  - b. The same as hospital
  - c. Worse than hospital

***Expectations regarding the child's well-being at home***

6. How do you think your child will feel during hospital-at-home concerning:

|          | Better than hospital | The same as hospital | Worse than hospital |
|----------|----------------------|----------------------|---------------------|
| Sleeping |                      |                      |                     |
| Eating   |                      |                      |                     |
| Playing  |                      |                      |                     |
| Hygiene  |                      |                      |                     |

***Possible influence factors***

7. During medical visits in hospital, does your child feel anxiety, cries, does not let staff touch him or her? Yes/No
8. Do you think having your child admitted in hospital increases your economic burden? Yes/No

**POSTADMISSION QUESTIONNAIRE:**

***Social questions:***

1. Parents' age
2. Parents' origin
3. Parents' educational background:
  - a. Elementary education
  - b. Secondary education
  - c. University degree or more
4. Number of people living at home
5. Does the patient have his or her own room? Yes/No
6. Is the home shared with other people in addition to his family? Yes/No
7. Do you think your home is adequate to accommodate your child during hospitalization? Yes/No
8. How many people in your family are unemployed?
9. Do you receive any economic support?
  - a. Social services support (dining scholarship, food aid, rental aid...)
  - b. Government subsidy (unemployment, subsistence income, family subsidy)
  - c. NGO (non-governmental organization)
  - d. Other economic support:
10. Does your child suffer any chronic condition? Yes/No
11. Does your child have a degree of disability? Yes/No
12. Does your child have any level of dependance? Yes/No
13. Do you have a reduction of time worked because of a sick child (beyond current admission? Yes/No
14. Do you have family or friends to help with your child if needed? Yes/No

***Current experience: Caregivers' well-being***

15. Have you felt neglected during home-hospitalization? Yes/No
16. Have you had any problems administering medication? Yes/No
17. In case you had problems administering medication, has the problem been solved?
  - a. Yes, rapidly
  - b. Yes, but it took too much time
  - c. No
18. How do you think the workload has been during home-hospitalization?
  - a. The expected
  - b. More than expected
  - c. Less than expected
19. Knowing about the workload that implies home-hospitalization, would you repeat it if necessary? Yes/No
20. How have you felt during home-hospitalization?
  - a. Better than in hospital
  - b. The same as in hospital
  - c. Worse than in hospital
21. You can specify how you have felt during home-hospitalization if you like:

**Current experience: Child's well-being**

22. How do you think your child has felt during hospital-at-home concerning:

|          | Better than hospital | The same as hospital | Worse than hospital |
|----------|----------------------|----------------------|---------------------|
| Sleeping |                      |                      |                     |
| Eating   |                      |                      |                     |
| Playing  |                      |                      |                     |
| Hygiene  |                      |                      |                     |

23. If you have answered "Better than hospital" in any of the cases, why do you think it is like that?

- a. Because he/she is in his/her own environment and accompanied by his/her family
- b. Because his/her health situation has improved
- c. Other

24. Do you think your child has recovered faster because of being at home?

- a. Yes
- b. No
- c. It has been the same

**Current experience: Economic burden**

25. Has it been an extra economic burden having your child admitted to home-hospitalization? Yes/No

26. How was the economic burden in home-hospitalization compared with conventional hospitalization?

- a. Indifferent
- b. Increased economic burden in hospital
- c. Increased economic burden at home

**Current experience: Home-hospitalization convenience**

27. Score from 1 to 10 the hospital-at-home program:

28. If your child needed to be admitted to hospital again, would you choose home-hospitalization? Yes/No

29. What do you think that can be improved in this home-hospitalization program?

**Attention received compared with conventional hospitalization**

30. Do you think your child would have been better cared of in hospital? Yes/No

31. If you answered "Yes" in the previous question, why do you think so?

- a. Because in hospital we have 24-hour on-site staff
- b. Because my child was not feeling well enough to be admitted to homecare
- c. Other

32. Please answer the next questions rating from 0=very bad to 5=excellent:

- a. How has it been home-hospitalization health staff attention?
- b. How has it been hospital health staff attention?
- c. How has information related to your child's health been explained to you during home hospitalization?
- d. How has information related to your child's health been explained to you during conventional hospitalization?

***Possible influence factors***

33. Has your child been admitted to hospital previously? Yes/No
34. Have you or anyone in your family come up against any bad experience in a hospital?  
Yes/No
35. If you have come up against any bad experience, please indicate which was.
